# Supplementary material
Source: Research Square preprint supplement (doi:10.21203/rs.3.rs-8264590/v1)
Supplement: Supplementary file 1 [file 294145500b1d02cff3d5aa26.docx]

**Supplementary Materials**

**S1. Measurement and Annotation of Ejection Fraction (EF)**

In this study, the measurement of EF was performed using M-mode echocardiography, following the steps outlined below:

1. A clear image was obtained at the parasternal long-axis view of the left ventricle, ensuring full exposure of the ventricular structures. In this view, the sampling line was positioned between the tips of the mitral valve leaflets and the chordae tendineae, oriented perpendicular to the long axis of the left ventricle.
2. The system was then switched to M-mode echocardiography. During the cardiac cycle, the left ventricular end-diastolic diameter (LVED) and left ventricular end-systolic diameter (LVES) were measured, with careful delineation of the endocardial borders to maximize accuracy.
3. Given that dimensional changes alone cannot fully reflect the true variations in ventricular volume, the modified cube method (Teichholz formula) was applied to estimate ventricular volumes, under the assumption that the left ventricle approximates an ellipsoid. The formula is as follows:

where D corresponds to LVED and LVES, respectively, to yield the left ventricular end-diastolic volume (LVEDV) and end-systolic volume (LVESV). The stroke volume (SV) was then derived as:

Finally, the echocardiographic system automatically calculated EF according to the following equation:

The accuracy of EF measurement was independently verified by three experienced echocardiographers, each with more than five years of practice. A value was considered valid if at least two evaluators reached consensus, and it was then adopted as the reference label for the corresponding ECG data.

**S2. Preprocessing of Electrocardiographic (ECG) Signals**

**S2.1 Denoising**

To eliminate high-frequency noise and baseline drift, the db5 wavelet basis was selected for nine-level wavelet decomposition of the ECG signals. Approximation coefficients (CA) and detail coefficients (CD) were extracted, where the first-level CA primarily reflected low-frequency baseline drift, and the seventh through ninth-level CDs corresponded to high-frequency disturbances. These components were set to zero. The ECG signals were then reconstructed from the processed coefficients, resulting in denoised signals with effective suppression of both baseline wander and unwanted high-frequency artifacts.

**S2.2 Peak Detection**

Peak detection was subsequently performed on the denoised ECG signals to identify the positions of the R waves. Python’s find_peaks() function was employed, applied to the processed ECG signals with a window size of 500 samples and a minimum inter-peak distance of 200 samples.

**S3. Supplementary Figures and Tables**

**Figure S3.1.** Echocardiographic EF annotation. A: M-mode echocardiographic image showing clinician annotations in a patient with EF = 25%; B: same for a patient with EF = 46%; C: same for a patient with EF = 74%.

**Figure S3.2.** ECG signal denoising examples across different EF ranges. A: comparison of original (blue) and denoised (red) ECG signals for a patient with EF = 34%; B: same for a patient with EF = 45%; C: same for a patient with EF = 66%.

**Figure S3.3.** R-peak detection and heartbeat segmentation from denoised ECG signals. A: Detected R-peaks (blue dots) on the denoised ECG signal of a patient with an ejection fraction (EF) of 66%, corresponding to the signal shown in Figure S2.C.; B: Individual heartbeats segmented from the denoised ECG signal of a patient with EF=66%, using the R-peaks identified in Figure S3.A.


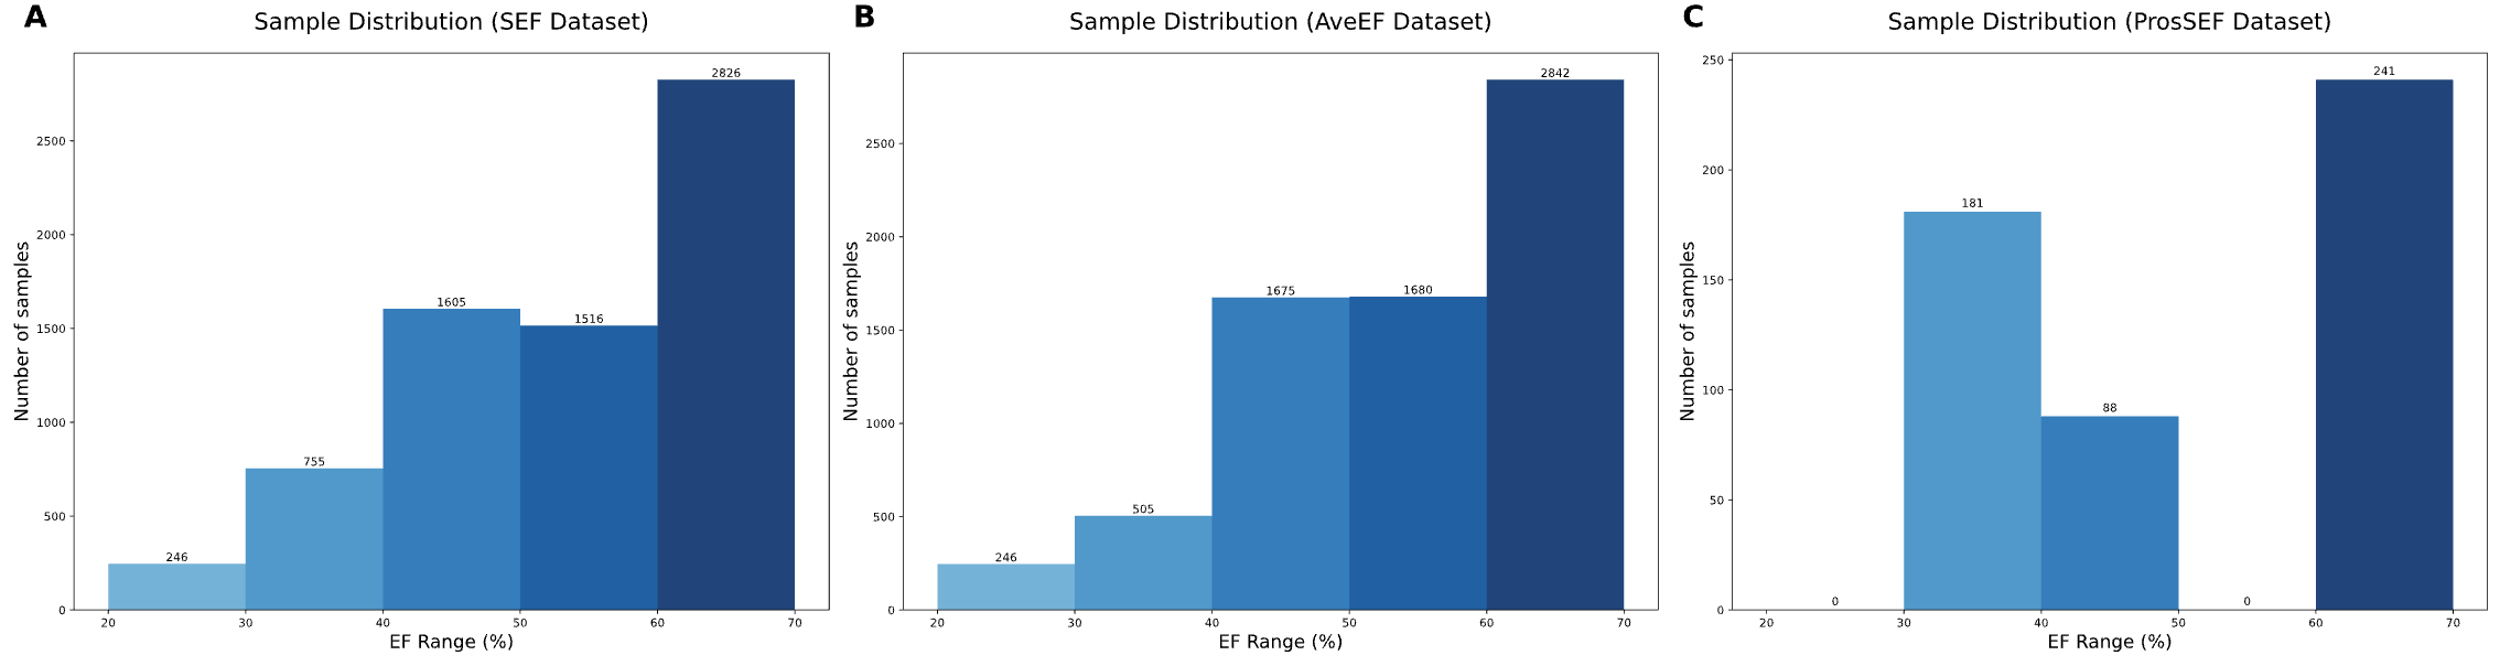


**Figure S3.4.** Sample distribution by ejection fraction (EF) intervals. A: SEF Dataset, per-beat Single EF labels; B: AveEF Dataset, per-patient average EF label; C: ProsSEF Dataset, per-beat Single EF labels for prospective study.

**Table S3.1.** CNN-LSTM model structure.

| Layer (type) | Output Shape | Param # |
| --- | --- | --- |
| conv1d (Conv1D) | (None, 440, 128) | 12928 |
| batch_normalization_4 (BatchNormalization) | (None, 440, 128) | 512 |
| max_pooling1d_1 (MaxPooling1D) | (None, 201, 128) | 0 |
| dropout_5 (Dropout) | (None, 201, 128) | 0 |
| separable_conv1d_3 (SeparableConv1D) | (None, 201, 64) | 14656 |
| batch_normalization_5 (BatchNormalization) | (None, 201, 64) | 256 |
| average_pooling1d_3 (AveragePooling1D) | (None, 91, 64) | 0 |
| dropout_6 (Dropout) | (None, 91, 64) | 0 |
| separable_conv1d_4 (SeparableConv1D) | (None, 91, 32) | 2720 |
| batch_normalization_6 (BatchNormalization) | (None, 91, 32) | 128 |
| average_pooling1d_4 (AveragePooling1D) | (None, 41, 32) | 0 |
| dropout_7 (Dropout) | (None, 41, 32) | 0 |
| separable_conv1d_5 (SeparableConv1D) | (None, 41, 16) | 688 |
| batch_normalization_7 (BatchNormalization) | (None, 41, 16) | 64 |
| average_pooling1d_5 (AveragePooling1D) | (None, 19, 16) | 0 |
| dropout_8 (Dropout) | (None, 19, 16) | 0 |
| lstm_1 (LSTM) | (None, 19, 32) | 6272 |
| dense_2 (Dense) | (None, 19, 32) | 1056 |
| dropout_9 (Dropout) | (None, 19, 32) | 0 |
| flatten_1 (Flatten) | (None, 608) | 0 |
| dense_3 (Dense) | (None, 1) | 609 |

Total params: 39889 (155.82 KB)

Trainable params: 39409 (153.94 KB)

Non-trainable params: 480 (1.88 KB)

**Table S3.2.** CNN model structure.

| Layer (type) | Output Shape | Param # |
| --- | --- | --- |
| conv1d_1 (Conv1D) | (None, 440, 128) | 12928 |
| batch_normalization_1 (BatchNormalization) | (None, 440, 128) | 512 |
| max_pooling1d (MaxPooling1D) | (None, 201, 128) | 0 |
| dropout_12 (Dropout) | (None, 201, 128) | 0 |
| separable_conv1d (SeparableConv1D) | (None, 201, 64) | 14656 |
| batch_normalization_2 (BatchNormalization) | (None, 201, 64) | 256 |
| average_pooling1d (AveragePooling1D) | (None, 91, 64) | 0 |
| dropout_13 (Dropout) | (None, 91, 64) | 0 |
| separable_conv1d_1 (SeparableConv1D) | (None, 91, 32) | 2720 |
| batch_normalization_3 (BatchNormalization) | (None, 91, 32) | 128 |
| average_pooling1d_1 (AveragePooling1D) | (None, 41, 32) | 0 |
| dropout_14 (Dropout) | (None, 41, 32) | 0 |
| separable_conv1d_2 (SeparableConv1D) | (None, 41, 16) | 688 |
| batch_normalization_4 (BatchNormalization) | (None, 41, 16) | 64 |
| average_pooling1d_2 (AveragePooling1D) | (None, 19, 16) | 0 |
| dropout_15 (Dropout) | (None, 19, 16) | 0 |
| flatten_1 (Flatten) | (None, 304) | 0 |
| dense_7 (Dense) | (None, 32) | 9760 |
| dropout_16 (Dropout) | (None, 32) | 0 |
| dense_8 (Dense) | (None, 1) | 33 |

Total params: 41745 (163.07 KB)

Trainable params: 41265 (161.19 KB)

Non-trainable params: 480 (1.88 KB)

**Table S3.3.** LSTM model structure.

| Layer (type) | Output Shape | Param # |
| --- | --- | --- |
| lstm (LSTM) | (None, 440, 128) | 66560 |
| dropout_7 (Dropout) | (None, 440, 128) | 0 |
| lstm_1 (LSTM) | (None, 440, 64) | 49408 |
| dropout_8 (Dropout) | (None, 440, 64) | 0 |
| lstm_2 (LSTM) | (None, 440, 32) | 12416 |
| dropout_9 (Dropout) | (None, 440, 32) | 0 |
| flatten (Flatten) | (None, 14080) | 0 |
| dense_5 (Dense) | (None, 32) | 450592 |
| dropout_10 (Dropout) | (None, 32) | 0 |
| dense_6 (Dense) | (None, 1) | 33 |

Total params: 579009 (2.21 MB)

Trainable params: 579009 (2.21 MB)

Non-trainable params: 0 (0.00 KB)

**Table S3.4.** Transformerer model structure.

| Layer (type) | Output Shape | Param # | Connected to |
| --- | --- | --- | --- |
| input_7 (InputLayer) | [(None, 440, 1)] | 0 | [] |
| conv1d_7 (Conv1D) | (None, 440, 128) | 256 | ['input_7[0][0]'] |
| batch_normalization_10  (BatchNormalization) | (None, 440, 128) | 512 | ['conv1d_7[0][0]'] |
| multi_head_attention_9  (MultiHeadAttention) | (None, 440, 128) | 66048 | ['batch_normalization_10[0][0]’, 'batch_normalization_10[0][0]’] |
| dropout_44 (Dropout) | (None, 440, 128) | 0 | ['multi_head_attention_9[0][0]'] |
| tf.__operators__.add_19  (TFOpLambda) | (None, 440, 128) | 0 | ['batch_normalization_10[0][0]’, 'dropout_44[0][0]'] |
| layer_normalization_18  (LayerNormalization) | (None, 440, 128) | 256 | ['tf.__operators__.add_19[0][0]'] |
| Dense_40 (Dense) | (None, 440, 128) | 16512 | ['layer_normalization_18[0][0]'] |
| Dense_41 (Dense) | (None, 440, 128) | 16512 | ['dense_40[0][0]'] |
| dropout_45 (Dropout) | (None, 440, 128) | 0 | ['dense_41[0][0]'] |
| tf.__operators__.add_20  (TFOpLambda) | (None, 440, 128) | 0 | ['layer_normalization_18[0][0]’, 'dropout_45[0][0]'] |
| layer_normalization_19  (LayerNormalization) | (None, 440, 128) | 256 | ['tf.__operators__.add_20[0][0]'] |
| multi_head_attention_10  (MultiHeadAttention) | (None, 440, 128) | 66048 | ['layer_normalization_19[0][0]', 'layer_normalization_19[0][0]’] |
| dropout_46 (Dropout) | (None, 440, 128) | 0 | ['multi_head_attention_10[0][0]’] |
| tf.__operators__.add_21  (TFOpLambda) | (None, 440, 128) | 0 | ['layer_normalization_19[0][0]', 'dropout_46[0][0]'] |
| layer_normalization_20  (LayerNormalization) | (None, 440, 128) | 256 | ['tf.__operators__.add_21[0][0]'] |
| dense_42 (Dense) | (None, 440, 128) | 16512 | ['layer_normalization_20[0][0]'] |
| dense_43 (Dense) | (None, 440, 128) | 16512 | ['dense_42[0][0]'] |
| dropout_47 (Dropout) | (None, 440, 128) | 0 | ['dense_43[0][0]'] |
| tf.__operators__.add_22  (TFOpLambda) | (None, 440, 128) | 0 | ['layer_normalization_20[0][0]', 'dropout_47[0][0]'] |
| layer_normalization_21  (LayerNormalization) | (None, 440, 128) | 256 | ['tf.__operators__.add_22[0][0]'] |
| global_average_pooling1d (GlobalAveragePooling1D) | (None, 128) | 0 | ['layer_normalization_21[0][0]'] |
| dense_44 (Dense) | (None, 64) | 8256 | ['global_average_pooling1d[0][0]'] |
| dropout_48 (Dropout) | (None, 64) | 0 | ['dense_44[0][0]'] |
| dense_45 (Dense) | (None, 32) | 2080 | ['dropout_48[0][0]'] |
| dropout_49 (Dropout) | (None, 32) | 0 | ['dense_45[0][0]'] |
| dense_46 (Dense) | (None, 1) | 33 | ['dropout_49[0][0]'] |

Total params: 210305 (821.50 KB)

Trainable params: 210049 (820.50 KB)

Non-trainable params: 256 (1.00 KB)

**Table S3.5.** CNN-Transformerer model structure.

| Layer (type) | Output Shape | Param # | Connected to |
| --- | --- | --- | --- |
| input_1 (InputLayer) | [(None, 440, 1)] | 0 | [] |
| conv1d (Conv1D) | (None, 440, 128) | 12928 | ['input_1[0][0]'] |
| batch_normalization  (Batch_Normalization) | (None, 440, 128) | 512 | ['conv1d[0][0]'] |
| max_pooling1d  (MaxPooling1D) | (None, 201, 128) | 0 | ['batch_normalization[0][0]'] |
| dropout (Dropout) | (None, 201, 128) | 0 | ['max_pooling1d[0][0]'] |
| separable_conv1d  (SeparableConv1D) | (None, 201, 64) | 14656 | ['dropout[0][0]'] |
| batch_normalization_1  (BatchNormalization) | (None, 201, 64) | 256 | ['separable_conv1d[0][0]'] |
| average_pooling1d  (AveragePooling1D) | (None, 91, 64) | 0 | ['batch_normalization_1[0][0]'] |
| dropout_1 (Dropout) | (None, 91, 64) | 0 | ['average_pooling1d[0][0]'] |
| separable_conv1d  (SeparableConv1D) | (None, 91, 32) | 2720 | ['dropout_1[0][0]'] |
| batch_normalization_2  (BatchNormalization) | (None, 91, 32) | 128 | ['separable_conv1d_1[0][0]'] |
| average_pooling1d  (AveragePooling1D) | (None, 41, 32) | 0 | ['batch_normalization_2[0][0]'] |
| dropout_2 (Dropout) | (None, 41, 32) | 0 | ['average_pooling1d_1[0][0]'] |
| separable_conv1d_2  (SeparableConv1D) | (None, 41, 16) | 688 | ['dropout_2[0][0]'] |
| batch_normalization_3  (BatchNormalization) | (None, 41, 16) | 64 | ['separable_conv1d_2[0][0]'] |
| average_pooling1d_2  (AveragePooling1D) | (None, 19, 16) | 0 | ['batch_normalization_3[0][0]'] |
| dropout_3 (Dropout) | (None, 19, 16) | 0 | ['average_pooling1d_2[0][0]'] |
| tf.__operators__.add  (TFOpLambda) | (None, 19, 16) | 0 | ['dropout_3[0][0]'] |
| multi_head_attention  (MultiHeadAttention) | (None, 19, 16) | 8592 | ['tf.__operators__.add[0][0]', 'tf.__operators__.add[0][0]'] |
| dropout_4 (Dropout) | (None, 19, 16) | 0 | ['multi_head_attention[0][0]'] |
| add (Add) | (None, 19, 16) | 0 | ['tf.__operators__.add[0][0]', 'dropout_4[0][0]'] |
| layer_normalization  (LayerNormalization) | (None, 19, 16) | 32 | ['add[0][0]'] |
| dense (Dense) | (None, 19, 256) | 4352 | ['layer_normalization[0][0]'] |
| dropout_5 (Dropout) | (None, 19, 256) | 0 | ['dense[0][0]'] |
| dense_1 (Dense) | (None, 19, 16) | 4112 | ['dropout_5[0][0]'] |
| dropout_6 (Dropout) | (None, 19, 16) | 0 | ['dense_1[0][0]'] |
| add_1 (Add) | (None, 19, 16) | 0 | ['layer_normalization[0][0]', 'dropout_6[0][0]'] |
| layer_normalization_1  (LayerNormalization) | (None, 19, 16) | 32 | ['add_1[0][0]'] |
| multi_head_attention_1  (MultiHeadAttention) | (None, 19, 16) | 8592 | ['layer_normalization_1[0][0]', 'layer_normalization_1[0][0]’] |
| dropout_7 (Dropout) | (None, 19, 16) | 0 | ['multi_head_attention_1[0][0]’] |
| add_2 (Add) | (None, 19, 16) | 0 | ['layer_normalization_1[0][0]', 'dropout_7[0][0]'] |
| layer_normalization_2  (LayerNormalization) | (None, 19, 16) | 32 | ['add_2[0][0]'] |
| dense_2 (Dense) | (None, 19, 256) | 4352 | ['layer_normalization_2[0][0]'] |
| dropout_8 (Dropout) | (None, 19, 256) | 0 | ['dense_2[0][0]'] |
| dense_3 (Dense) | (None, 19, 16) | 4112 | ['dropout_8[0][0]'] |
| dropout_9 (Dropout) | (None, 19, 16) | 0 | ['dense_3[0][0]'] |
| add_3 (Add) | (None, 19, 16) | 0 | ['layer_normalization_2[0][0]', 'dropout_9[0][0]'] |
| layer_normalization_3  (LayerNormalization) | (None, 19, 16) | 32 | ['add_3[0][0]'] |
| multi_head_attention_2  (MultiHeadAttention) | (None, 19, 16) | 8592 | ['layer_normalization_3[0][0]', 'layer_normalization_3[0][0]’] |
| dropout_10 (Dropout) | (None, 19, 16) | 0 | ['multi_head_attention_2[0][0]’] |
| add_4 (Add) | (None, 19, 16) | 0 | ['layer_normalization_3[0][0]', 'dropout_10[0][0]'] |
| layer_normalization_4  (LayerNormalization) | (None, 19, 16) | 32 | ['add_4[0][0]'] |
| dense_4 (Dense) | (None, 19, 256) | 4352 | ['layer_normalization_4[0][0]'] |
| dropout_11 (Dropout) | (None, 19, 256) | 0 | ['dense_4[0][0]'] |
| dense_5 (Dense) | (None, 19, 16) | 4112 | ['dropout_11[0][0]'] |
| dropout_12 (Dropout) | (None, 19, 16) | 0 | ['dense_5[0][0]'] |
| add_5 (Add) | (None, 19, 16) | 0 | ['layer_normalization_4[0][0]', 'dropout_12[0][0]'] |
| layer_normalization_5  (LayerNormalization) | (None, 19, 16) | 32 | ['add_5[0][0]'] |
| flatten (Flatten) | (None, 304) | 0 | ['layer_normalization_5[0][0]'] |
| dense_6 (Dense) | (None, 1) | 305 | ['flatten[0][0]'] |

Total params: 83617 (326.63 KB)

Trainable params: 83137 (324.75 KB)

Non-trainable params: 480 (1.88 KB)
