# Supplementary material
Source: Research Square preprint supplement (doi:10.21203/rs.3.rs-8264590/v1)
Supplement: Supplementary file 2 [file 4e83e02c1c76866dcccd86d8.xlsx]

## Sheet: Sheet1
Table 1. Baseline Characteristics of the Development Cohort. (Gender is coded as 0 = Female, 1 = Male; Diabetes and Hypertension are coded as 1 = Yes, 0 = No; '-' indicates the variable was not measured at hospital admission.)
Patient ID	Gender	Age	Admission Diagnosis	Diabetes	Hypertension	LVEF (%)	Hospital Stay (days)	Outcome	BNP (pg/ml)	WBC (x109/L）	HGB (g/L)	ALT (U/L)	AST (U/L)	K+ (mmol/L)	Na+ (mmol/L)	Ca2+ (mmol/L)	ECG Findings
1	0	72	Multiple injuries	1	1	61	8	Improved	237	14.44	100	22	22.6	4.46	136.45	2.31	Sinus rhythm, Frequent atrial premature beats, Anterior abnormal Q wave, ST-T changes
2	1	55	Traumatic splenic rupture	0	1	63	17	Improved	10300	11.99	84	27	93.8	3.49	140.88	1.88	Sinus rhythm, Anterior abnormal Q wave, Left ventricular high voltage, ST-T changes
3	0	75	Pulmonary infection	1	1	*	5	Deceased	5680	8.22	118	12	20.5	3.04	139.79	1.94	Sinus rhythm,ST segment changes, Right axis deviation
4	0	63	Severe pneumonia	0	0	64	19	Improved	2690	3.72	85	32	59	3.16	149.97	2.08	-
5	1	88	Hypoxemic respiratory failure	1	1	61	22	Deteriorated	1520	29.75	113	27	27	4.58	141.07	2.02	Atrial fibrillation with rapid ventricular response, limb lead low voltage, ventricular premature beats, ST segment changes
6	1	69	Viral encephalitis	0	0	65	44	Improved	10800	13.44	68	17	46	6.02	134.26	2.01	Sinus tachycardia, ST-T changes
7	0	70	Hepatic metastasis	0	1	42	23	Improved	8620	2.64	101	27	41.8	3.37	135.97	2.02	Sinus tachycardia, ST-T changes
8	0	80	Extremely severe closed TBI	0	1	62	27	Improved	422	19.05	96	76	74	5.66	144.86	2.45	Sinus bradycardia, mild ST segment changes
9	1	77	Acute respiratory failure	0	0	72	20	Improved	2020	4.24	90	45	39.7	3.68	140.22	1.97	Sinus rhythm
10	0	53	Acute respiratory failure	0	1	69	38	Improved	>30000	5.74	78	9	22.4	4.9	130.95	2.61	Sinus rhythm, ST-T changes
11	1	81	Pulmonary infection	0	0	65	36	Improved	11000	16.91	72	113	257	3.98	144.53	2.16	Sinus rhythm, T wave changes
12	1	77	Ischemic stroke	0	1	71	6	Improved	788	10.58	65	28	22	4.53	137.37	1.94	Ischemic stroke
13	1	44	Mixed gas poisoning	0	1	-	11	Improved	274	12.59	128	43	36	4.43	137.87	2.39	Sinus bradycardia, short PR interval
14	1	51	Basal ganglia hemorrhage	0	1	65	34	Improved	12700	5.57	66	9	24	4.24	141.16	2.75	Sinus rhythm
15	1	59	Targeted cancer therapy	0	0	-	3	Improved	172	10.52	98	13	23.1	3.27	138.05	1.93	-
16	0	68	Ruptured abdominal aortic aneurysm	0	0	70	14	Improved	490	17.2	67	18	19.4	4.87	133.37	1.77	Sinus rhythm, ST-T changes
17	1	59	Severe pneumonia	0	0	61	13	Improved	642	8.48	127	35	65	3.88	152.23	2.29	Sinus rhythm
18	0	60	Mass in the left pterygopalatine fossa	0	0	66	35	Improved	496	12.13	87	13	18.5	4.43	137.24	1.93	Sinus rhythm, counterclockwise rotation, ST-T changes
19	1	62	Duodenal bulb ulcer with perforation	1	1	44	17	Deteriorated	13000	15.37	193	20	16.8	4.1	141.8	2.47	Sinus arrhythmia, ST-T changes
20	1	49	Sepsis	1	0	59	16	Improved	325	14.04	114	27	42	6.74	120.76	2.26	Sinus tachycardia, mild ST segment changes
21	0	62	Femoral metastasis	0	0	71	18	Deteriorated	2060	8.81	76	10	27.5	1.99	150.15	2.01	Sinus tachycardia, short PR interval, atrial premature beats
22	1	66	Pulmonary infection	1	1	43	29	Deteriorated	3230	6.13	82	27	25	3.5	152.93	1.96	Sinus rhythm, limb lead low QRS voltage, ST segment changes
23	1	35	Status epilepticus	0	0	-	17	Improved	-	6.16	126	82	35	4.25	139.19	2.14	Sinus rhythm
24	0	67	Immune-mediated peripheral neuropathy	1	1	48	31	Improved	334	5.96	82	19	28	2.74	143.57	1.95	Atrial fibrillation with rapid ventricular response, ST-T changes
25	1	84	Colonic perforation	0	0	41	11	Deceased	>30000	9.49	86	14	20.6	4.55	138.63	2.19	Sinus tachycardia, inferior abnormal Q waves, left ventricular high voltage, ST-T changes
26	1	65	Acute heart failure	0	0	21	16	Deteriorated	>30000	8.61	146	131	448	4.01	146.38	2.59	Sinus rhythm
27	1	56	Severe pneumonia	1	1	57	69	Improved	684	5.45	90	42.9	29.7	3.84	139	2.19	Sinus tachycardia, T wave changes
28	1	58	Severe pneumonia	1	0	55	19	Improved	>30000	26.99	63	9	20	5.44	140.26	2.18	Sinus tachycardia
29	0	76	Intestinal necrosis	0	0	60	8	Deteriorated	15200	9.37	98	46	31	3.39	152.39	2.29	Sinus arrhythmia, ST segment changes
30	1	60	Pulmonary infection	0	0	76	8	Deteriorated	10400	3.56	71	26	18.8	4.29	140.88	2.07	Sinus arrhythmia, ST-T changes
31	1	67	Chronic kidney disease stage 5	0	1	52	8	Improved	>30000	8.26	62	53	56.1	4.24	138.68	2.14	Sinus arrhythmia, T wave changes
32	1	55	Malignant tumor of the cheek and gingiva	0	0	68	24	Improved	51	8.26	97	24	24.4	4.32	135.74	2.12	Sinus arrhythmia
33	1	84	Hypoxic-ischemic encephalopathy	1	0	63	8	Improved	1040	5.27	150	24	31.1	3.4	146.99	2.32	Sinus arrhythmia, ST-T changes, limb lead low QRS voltage
34	0	71	Severe pneumonia	1	1	56	14	Deteriorated	18200	9.96	112	18	25	3.73	153.5	2.54	Sinus arrhythmia, ST-T changes
35	1	67	Intestinal obstruction	0	1	69	18	Improved	2260	6.48	88	55	19.2	3.41	137.78	2.16	Sinus tachycardia, ST-T changes
36	1	17	Closed traumatic brain injury	0	0	-	8	Improved	148	9.32	85	15	33	3.61	138.3	1.98	Sinus arrhythmia
37	1	79	Edema	1	0	65	17	Improved	490	19.05	86	23	39	4.19	135.26	2.21	Sinus tachycardia, ST-T changes
38	0	47	Cardiac arrest (successfully resuscitated)	0	0	40	12	Improved	1290	11.05	124	729	276.2	3.86	137.38	2.14	Sinus bradycardia, frequent premature atrial contractions with some showing intraventricular conduction aberrancy, ST-T changes
39	1	91	Respiratory failure	0	1	-	60	Improved	-	5.06	91	23	36	3.83	158.23		-
40	1	62	Closed traumatic brain injury	0	1	-	10	Improved	-	13.42	93	128	59.3	4.16	150.39	2.14	Sinus rhythm
41	1	62	Severe pneumonia	1	1	49	19	Improved	4490	6.19	116	12	21.7	4.56	157.52	2.57	Atrial fibrillation with rapid ventricular rate, T wave changes
42	0	70	Mass in the cheek	0	0	77	4	Improved	130	12.44	119	16	20.9	3.87	144.42	2.29	Sinus arrhythmia, ST-T changes
