# Supplementary material
Source: Research Square preprint supplement (doi:10.21203/rs.3.rs-8264590/v1)
Supplement: Supplementary file 3 [file fdbcc61ab62c299716bc907a.xlsx]

## Sheet: Sheet1
Table 1. Baseline Characteristics of the Retrospective Study Population. (Gender is coded as 0 = Female, 1 = Male; Diabetes and Hypertension are coded as 1 = Yes, 0 = No; '-' indicates the variable was not measured at hospital admission.)
Patient ID	Gender	Age	Admission Diagnosis	Diabetes	Hypertension	LVEF (%)	Hospital Stay (days)	Outcome	BNP (pg/ml)	WBC (x109/L）	HGB (g/L)	ALT (U/L)	AST (U/L)	K+ (mmol/L)	Na+ (mmol/L)	Ca2+ (mmol/L)	ECG Findings
43	0	87	Hepatic flexure colon cancer	0	0	44	21	Deceased	30000	4.69	68	18	22	4.29	144.87	2.13	Sinus tachycardia, left ventricular high voltage, ST segment changes
44	1	32	Hypoxic-ischemic encephalopathy	0	0	64	1	Deteriorated	6900	10.09	127	76	82.5	4.32	155.22	2.13	Sinus arrhythmia, ST segment changes
45	0	85	Acute heart failure	0	0	37	11	Improved	18300	6.14	96	40	35.2	3.42	135.49	18300	Sinus rhythm, frequent premature atrial contractions, anterior abnormal Q waves, ST-S changes
